# Supplementary material
Source: PubMed Central journal article supplement (PMC8902526)
Supplement: ajtr0014-0899-f7.pdf [file ajtr0014-0899-f7.pdf]

## Let-7c, RNA activation and A $\beta$ production

**Supplementary Table 1.** Sequences for pSuper plasmid and primers sequences for PCR cloning

| Name                               | Sequence                                                               |
|------------------------------------|------------------------------------------------------------------------|
| hsa-let-7c (sense) F1              | GATCCCCTGAGGTAGTAGGTTGTATGGTTTTCAAGAGAAACCATACAACCTACTACCTCATTITTTA    |
| hsa-let-7c (antisense) R1          | AGCTTAAAAATGAGGTAGTAGGTTGTATGGTTTCTTGTAAAACCATACAACCTACTACCTCAGGG      |
| hsa-mir-99a (sense) F2             | GATCCCCAACCCGTAGATCCGATCTTGTGTTCAAGAGACACAAGATCGGATCTACGGGTTTTTTTA     |
| hsa-mir-99a (antisense) R2         | AGCTTAAAAAACCCGTAGATCCGATCTTGTGTTCAAGAGACACAAGATCGGATCTACGGGTTGGG      |
| hsa-mir-155 (sense) F3             | GATCCCCTTAATGCTAATCGTGATAGGGGTTTCAAGAGAACCCCTATCACGATTAGCATTAAITTTTA   |
| hsa-mir-155 (antisense) R3         | AGCTTAAAAATTAATGCTAATCGTGATAGGGGTTTCAAGAGAACCCCTATCACGATTAGCATTAAAGG   |
| siArgonaute1 (sense) F4            | GATCCCCATACACACAGGTGCTCATTCAAGAGAAGATGAGACACCTGTGTATGTTTTTA            |
| siArgonaute1 (antisense) R4        | AGCTTAAAAACATACACACAGGTGCTCATCTCTTGAATGAGACACCTGTGTATGTTGGG            |
| siArgonaute2 (sense) F5            | GATCCCCGGGTAAAGTTTACCAAAGATCAAGAGAAAGATCTTTGGTAAACTTTACCCTTTTTA        |
| siArgonaute2 (antisense) R5        | AGCTTAAAAAGGTAAAGTTTACCAAAGATCTTGAATCTTTGGTAAACTTTACCCGGG              |
| siBACE2 (sense) F6                 | GATCCCCTCGAGTCTGAGAATTTCTTTCAAGAGAAAGAATCTCAGACTCGATTTTTA              |
| siBACE2 (antisense) R6             | AGCTTAAAAATCGAGTCTGAGAATTTCTTTCTTGTAAAAGAAATCTCAGACTCGAGGG             |
| siNicastrin (sense) F7             | GATCCCCAAGGGCAAGTTTCCCGTGCAGTTTTCAAGAGAACTGCACGGGAAACTTGCCCTTTTTTA     |
| siNicastrin (antisense) R7         | AGCTTAAAAAAGGGCAAGTTTCCCGTGCAGTTTTCTTGTAAAAGAACTGCACGGGAAACTTGCCCTTGGG |
| forward primer F8 for BACE1 3'-UTR | CTAGCTAGCGGAGGCCATGGGCAGAAGA                                           |
| reverse primer R8 BACE1 3'-UTR     | ACGCGTCGACGACTTCTTATTGAATATTTACTG                                      |
| forward primer F9 for BACE2 3'-UTR | CTAGCTAGCTCTGGTCAGACATCGCTGG                                           |
| reverse primer R9 BACE2 3'-UTR     | ACGCGTCGACTTTTTTCTCATCAAACATG                                          |

**Supplementary Table 2.** Primers sequences for RT-PCR and RT-qPCR

| Name                          | Sequence                 |
|-------------------------------|--------------------------|
| pre-let-7c primer forward     | GCATCCGGGTTGAGGTAGTAG    |
| pre-let-7c primer reverse     | GCTCCAAGGAAAGCTAGAAGG    |
| Argonaute1 primer forward     | GACCTCCGCACGGGTATATG     |
| Argonaute1 primer reverse     | GGTTTCCCACAGTGCCAAT      |
| Argonaute2 primer forward     | TGGTTTGGCTTCCATCAGTCC    |
| Argonaute2 primer reverse     | CCTTGTAACGCTGTTGCTGAC    |
| BACE2 primer forward          | GCGGGCTACTACCTGGAGATG    |
| BACE2 primer reverse          | GTCTATGTGGAGTGCAGGGG     |
| $\beta$ -Actin primer forward | GACAGGATGCAGAAGGAGATTACT |

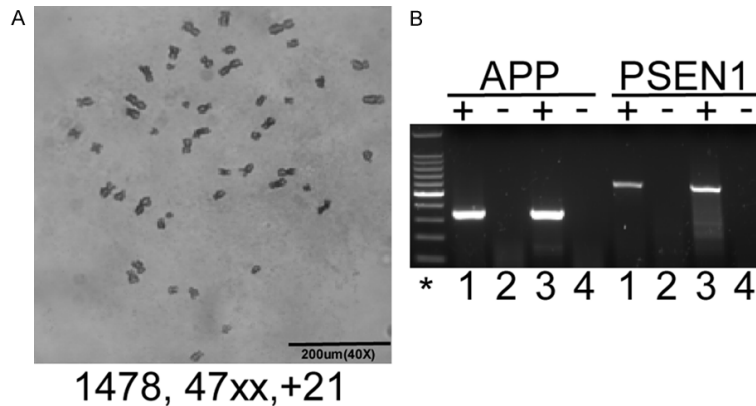

**Supplementary Figure 1.** Karyotyping of DS cell line and Gene-type of AD mice. A. Karyotyping of DS cell line MB1478 shown with 47 chromosomes; B. Gene-type of transgenic AD mice (APP<sup>sw</sup>/PS1<sup>AE9</sup>) and wild-type mice affirmed by RT-PCR.
